# Supplementary material for: Two metal–organic frameworks with unique high-connected binodal network topologies: synthesis, structures, and catalytic properties
Source: Royal Society of Chemistry journal article supplement (doi:10.1039/c2ce25264c), 2012-01-01
Supplement: c2ce25264c.pdf [file c2ce25264c.pdf]

## Supporting Information

### Two Metal-Organic Frameworks with Unique High-Connected Binodal Network Topologies: Synthesis, Structures, and Catalytic Properties

Guang-hua Cui<sup>\*a</sup>, Cui Hong He<sup>a</sup>, Cui Huan Jiao<sup>a</sup>, Jian-Chen Geng<sup>a</sup>, Vladislav A. Blatov<sup>b</sup>

Supporting Information Fig. S1—Fig. S6

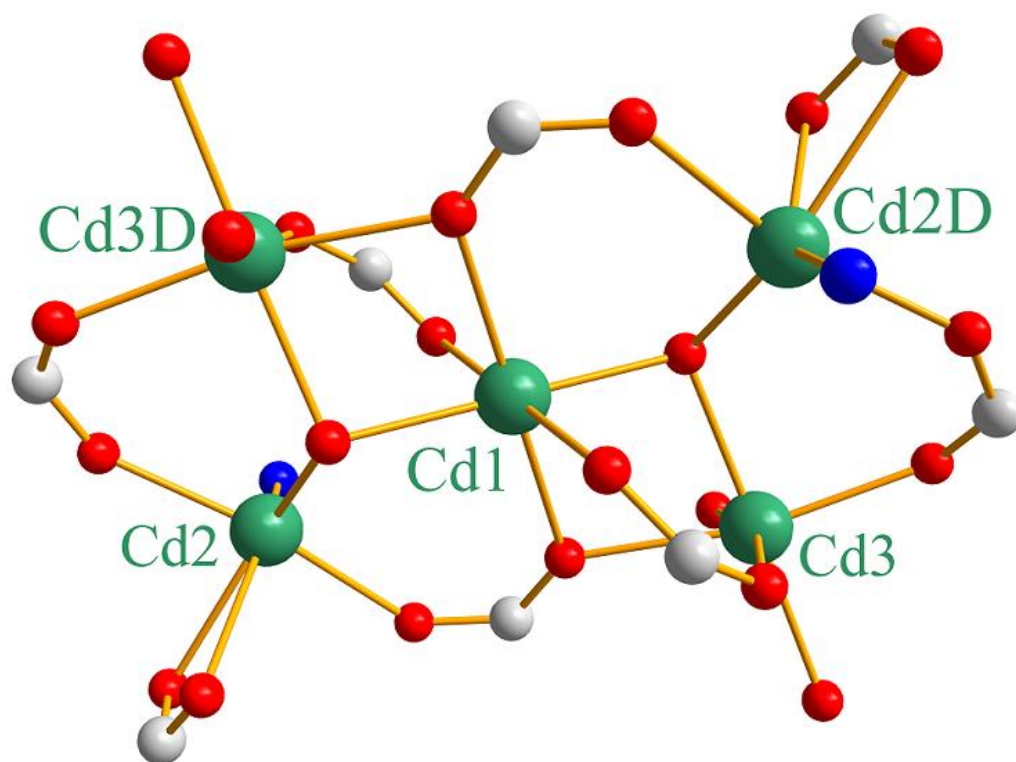

Fig. S1. The Cd pentamers ( $[\text{Cd}_5(\text{COO})_8(\text{OH})_2]$ ) SBUs in **1**. symmetry code D:  $-x, -y+1, -z+1$

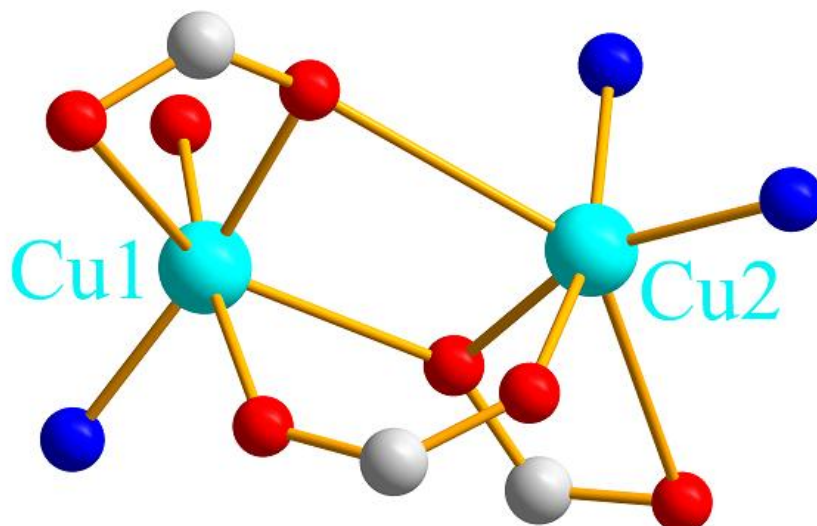

Fig. S2. The Cu dimer SBUs  $[\text{Cu}_2(\text{COO})_4]$  in **2**. symmetry code D:  $-x, -y+1, -z+1$

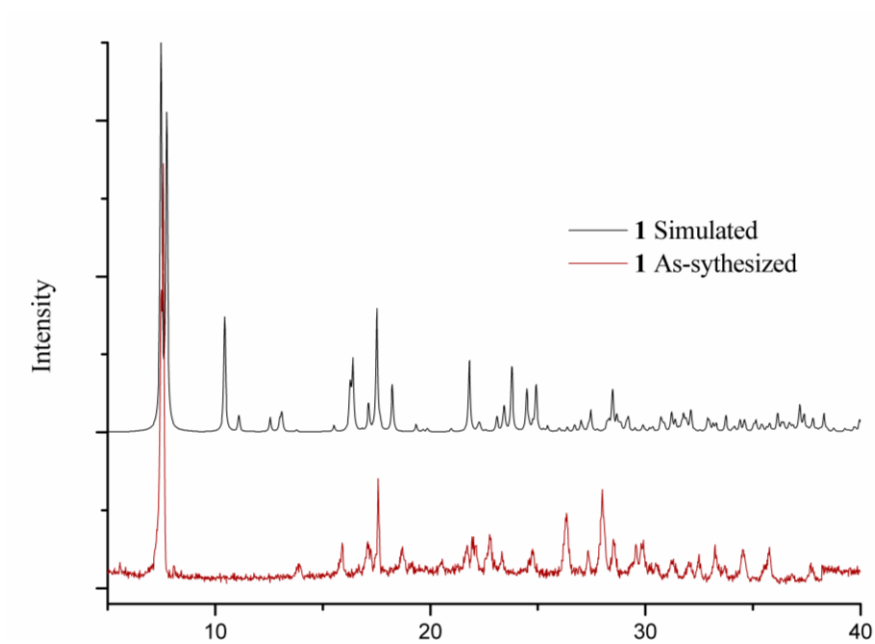

Fig. S3 XRPD pattern of the crystal **1** and their calculated

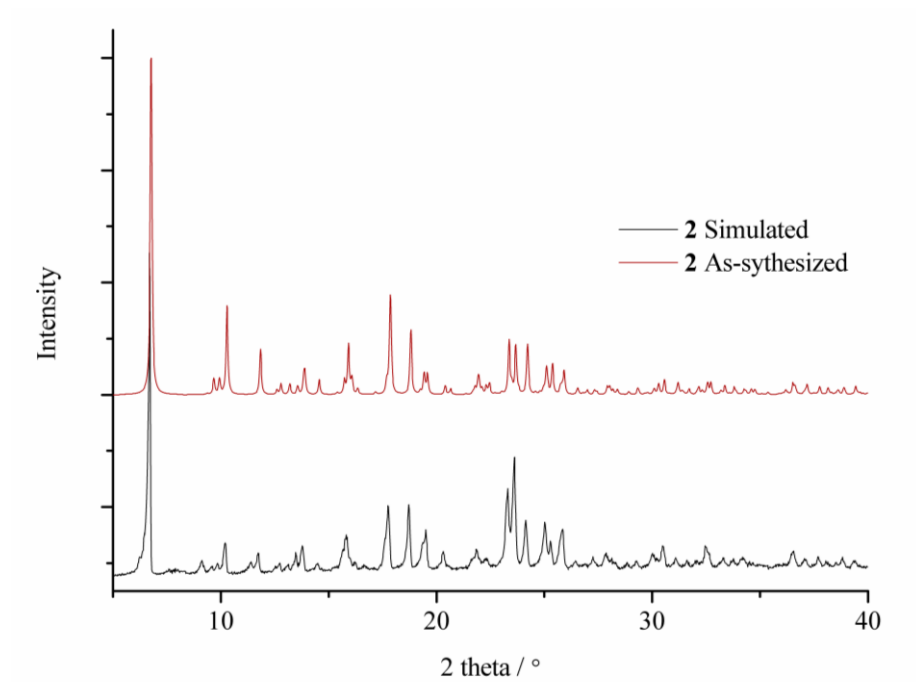

Fig. S4 XRPD pattern of the crystal **2** and their calculated

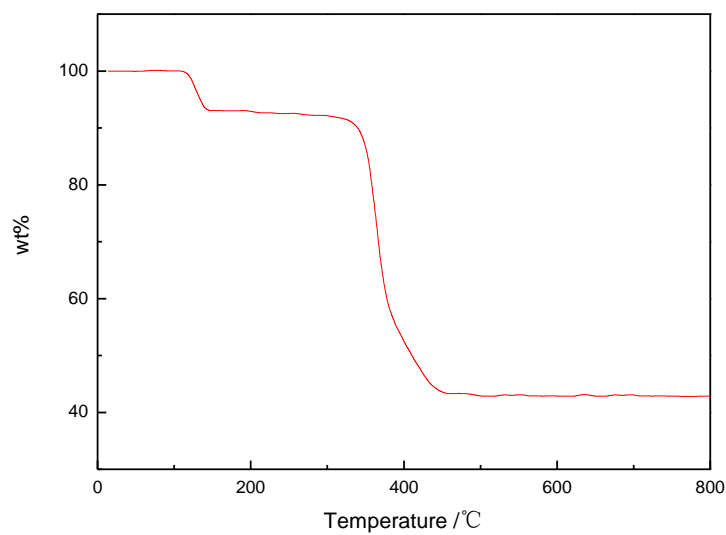

Fig. S5 The TG curves of **1**.

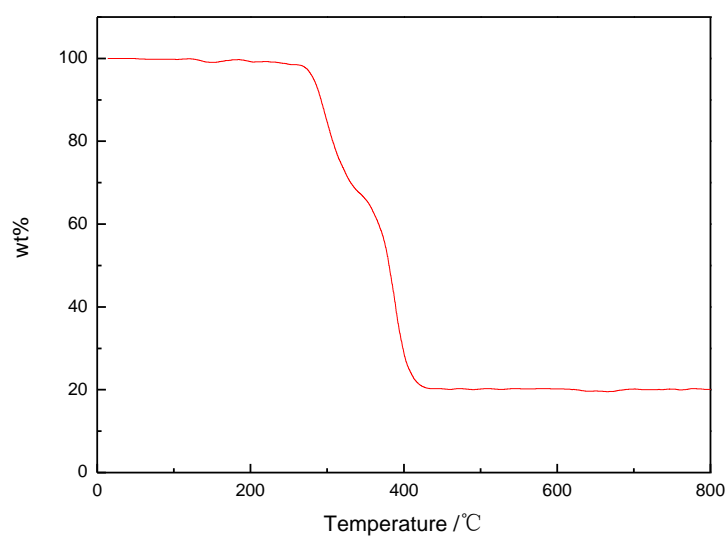

Fig. S6 The TGA curve of **2**.
